# Supplementary material for: Ultraviolet emission and electron spin characteristics of Th(C2O4)2·xH2O:Gd3+
Source: Royal Society of Chemistry journal article supplement (doi:10.1039/d0nj03360j), 2020-01-01
Supplement: d0nj03360j1.pdf [file d0nj03360j1.pdf]

Electronic Supplementary Material (ESI) for New Journal of Chemistry. This journal is © The Royal Society of Chemistry and the Centre National de la Recherche Scientifique 2020

**New Journal of Chemistry**  
***Electronic Supporting Information***

**Ultraviolet Emission and Electron Spin Characteristics of Th (C<sub>2</sub>O<sub>4</sub>)<sub>2</sub>.xH<sub>2</sub>O:Gd<sup>3+</sup>**

Santosh K. Gupta<sup>1\*</sup>, B. Rajeshwari<sup>1</sup>, S.N. Achary<sup>2,3</sup>, R.M. Kadam<sup>1,2</sup>

<sup>1</sup>Radiochemistry Division, Bhabha Atomic Research Centre, Mumbai 400085, India

<sup>2</sup>Chemistry Division, Bhabha Atomic Research Centre, Mumbai 400085, India

<sup>3</sup>Homi Bhabha National Institute, Anushaktinagar, Mumbai – 400094, India

\*Corresponding Author-[santoshg@barc.gov.in](mailto:santoshg@barc.gov.in), [santufnd@gmail.com](mailto:santufnd@gmail.com)

Telephone-+91-22-25590636, Fax-+91-22-25505151

Table S1. Position coordinates of various atoms in triclinic (P1) structure of TOHG

| Atom  | Wyc. | x          | y           | z           | U(eq) Å <sup>2</sup> |
|-------|------|------------|-------------|-------------|----------------------|
| Th1   | 1a   | -0.0060(8) | -0.0026(8)  | -0.0023(6)  | 0.0414               |
| C1    | 1a   | 0.0411(13) | 0.5053(3)   | 0.09856(16) | 0.0414               |
| O1    | 1a   | 1.088(5)   | 0.3343(7)   | 0.1812(8)   | 0.0414               |
| O2    | 1a   | 0.061(2)   | 0.6573(9)   | 0.8182(4)   | 0.0414               |
| C2    | 1a   | 1.0007(6)  | 0.4968(2)   | 0.90687(14) | 0.0414               |
| O3    | 1a   | 0.020(7)   | 0.7356(11)  | 0.1937(7)   | 0.0414               |
| O4    | 1a   | 1.027(4)   | 0.2630(7)   | 0.8093(5)   | 0.0414               |
| C3    | 1a   | 0.4992(5)  | 1.0038(15)  | 0.9022(2)   | 0.0414               |
| O5    | 1a   | 0.6563(10) | 0.079(3)    | 0.8177(5)   | 0.0414               |
| O6    | 1a   | 0.3463(9)  | 0.950(6)    | 0.1802(7)   | 0.0414               |
| C4    | 1a   | 0.5145(4)  | -0.0127(16) | 0.09440(17) | 0.0414               |
| O7    | 1a   | 0.2657(8)  | 0.974(6)    | 0.8127(5)   | 0.0414               |
| O8    | 1a   | 0.7376(9)  | 0.067(3)    | 0.1885(5)   | 0.0414               |
| O11W* | 1a   | 0.2830     | 0.7170      | 0.5000      | 0.0414               |
| O12W* | 1a   | 0.7170     | 0.2830      | 0.5000      | 0.0414               |
| O13W* | 1a   | 0.7160     | 0.7160      | 0.4810      | 0.0414               |
| O14W* | 1a   | 0.2840     | 0.2840      | 0.5190      | 0.0414               |
| O15W* | 1a   | 0.5000     | 0.5000      | 0.0000      | 0.0414               |
| O16W* | 1a   | 0.0000     | 0.0000      | 0.5000      | 0.0414               |

\*W: Water molecule and no hydrogen atom is considered. Kept fixed as the equivalent positions in monoclinic lattice in the refinement

Triclinic (P1)

a = 6.4696 Å, b = 6.4617 Å, c = 7.8796 Å,  $\alpha = 90.43^\circ$ ,  $\beta = 91.96^\circ$ ,  $\gamma = 89.89^\circ$

R<sub>p</sub>: 18.9 % R<sub>w</sub>: 24.1 %; R<sub>B</sub>: 16.2 %

Table S2. Typical bond lengths (Å) and angles (°) in TOHG. The water molecules are not considered.

| Bonds lengths |           | Angles    |           |           |          | Torsion angles |            |
|---------------|-----------|-----------|-----------|-----------|----------|----------------|------------|
| Th1-O1        | 2.664(10) | O4-Th1-O5 | 65.8(7)   | Th1-O1-C1 | 111.9(8) | O4-Th1-O1-C1   | 22.1(16)   |
| Th1-O2        | 2.648(8)  | O1-Th1-O4 | 73.4(3)   | Th1-O2-C2 | 108.2(3) | O5-Th1-O1-C1   | -35.1(18)  |
| Th1-O3        | 2.301(9)  | O4-Th1-O8 | 111.3(7)  | Th1-O3-C1 | 111.2(3) | O8-Th1-O1-C1   | -98.9(18)  |
| Th1-O4        | 2.293(7)  | O2-Th1-O4 | 104.8(3)  | Th1-O4-C2 | 111.2(4) | O2-Th1-O1-C1   | 110.8(17)  |
| Th1-O5        | 2.619(9)  | O4-Th1-O7 | 63.2(10)  | Th1-O5-C3 | 106.9(5) | O7-Th1-O1-C1   | 78.7(19)   |
| Th1-O6        | 2.671(9)  | O3-Th1-O4 | 170.4(13) | Th1-O6-C4 | 113.8(6) | O3-Th1-O1-C1   | -167.2(19) |
| Th1-O7        | 2.326(7)  | O4-Th1-O6 | 109.9(9)  | Th1-O7-C3 | 115.1(4) | O6-Th1-O1-C1   | 142.3(19)  |
| Th1-O8        | 2.318(8)  | O1-Th1-O5 | 107.4(7)  | Th1-O8-C4 | 106.2(4) | O4-Th1-O6-C4   | -35(2)     |
|               |           | O5-Th1-O8 | 73.2(2)   | O3-C1-C2  | 117.2(4) | O1-Th1-O6-C4   | -97(2)     |
| C1-C2         | 1.525(2)  | O2-Th1-O5 | 91.6(4)   | O1-C1-O3  | 123.2(5) | O8-Th1-O6-C4   | -156(2)    |
| C3-C4         | 1.519(2)  | O5-Th1-O7 | 107.9(3)  | O1-C1-C2  | 119.6(3) | O2-Th1-O6-C4   | 72(2)      |
|               |           | O3-Th1-O5 | 123.7(11) | O2-C2-O4  | 115.0(5) | O7-Th1-O6-C4   | 16(2)      |
| C1-O1         | 1.316(9)  | O5-Th1-O6 | 174.9(9)  | O4-C2-C1  | 117.2(3) | O3-Th1-O6-C4   | 143(3)     |
| C1-O3         | 1.669(8)  | O1-Th1-O8 | 69.5(7)   | O2-C2-C1  | 117.2(3) | Th1-O3-C1-C2   | -11(3)     |
| C2-O2         | 1.322(7)  | O1-Th1-O2 | 157.4(8)  | O5-C3-O7  | 122.1(6) | Th1-O3-C1-O1   | 169.8(19)  |
| C2-O4         | 1.701(6)  | O1-Th1-O7 | 103.0(10) | O7-C3-C4  | 116.3(3) | Th1-O4-C2-O2   | 166.0(9)   |
| C3-O5         | 1.329(10) | O1-Th1-O3 | 103.2(4)  | O5-C3-C4  | 120.2(4) | Th1-O4-C2-C1   | 22.2(15)   |
| C3-O7         | 1.656(7)  | O1-Th1-O6 | 68.2(10)  | O8-C4-C3  | 116.2(4) | Th1-O7-C3-O5   | -151.5(14) |
| C4-O6         | 1.324(9)  | O2-Th1-O8 | 129.5(5)  | O6-C4-O8  | 122.7(5) | Th1-O7-C3-C4   | 15(2)      |
| C4-O8         | 1.680(9)  | O7-Th1-O8 | 172.2(10) | O6-C4-C3  | 119.8(3) | Th1-O8-C4-C3   | -31.8(12)  |
|               |           | O3-Th1-O8 | 75.0(10)  |           |          | Th1-O8-C4-O6   | 161(2)     |
|               |           | O6-Th1-O8 | 106.8(3)  |           |          | O3-C1-C2-O4    | 179(2)     |
|               |           | O2-Th1-O7 | 58.4(9)   |           |          | O7-C3-C4-O8    | -167.3(17) |
|               |           | O2-Th1-O3 | 74.8(3)   |           |          |                |            |
|               |           | O2-Th1-O6 | 92.2(8)   |           |          |                |            |
|               |           | O3-Th1-O7 | 109.7(12) |           |          |                |            |
|               |           | O6-Th1-O7 | 71.4(2)   |           |          |                |            |
|               |           | O3-Th1-O6 | 60.7(12)  |           |          |                |            |

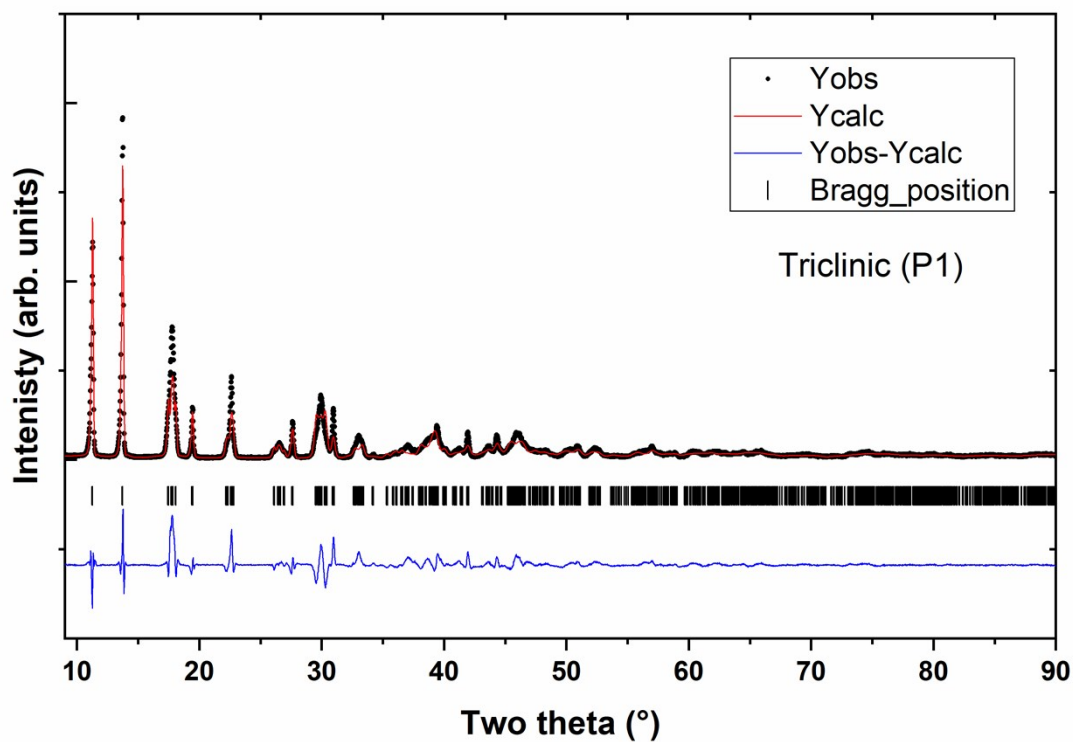

Figure S1. Rietveld refinement plot of TOHG in triclinic (P1) model structure

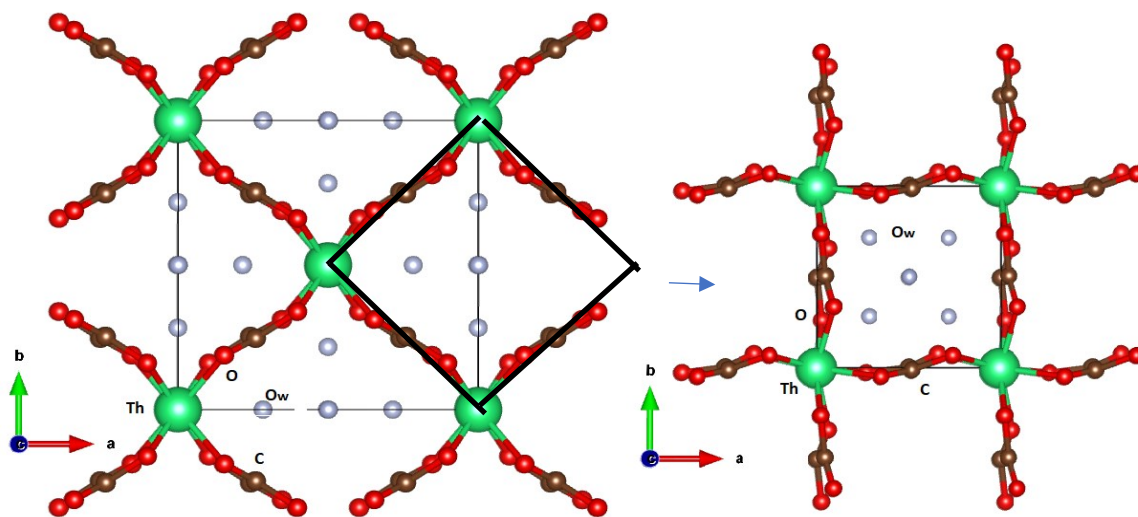

Figure S2. Relation between monoclinic, C2/m (left) and triclinic, P1 (right) structure of TOHG.
